# Supplementary material for: Deacetylation-mediated interaction of SIRT1-HMGB1 improves survival in a mouse model of endotoxemia
Source: PubMed Central journal article supplement (PMC4629154; doi:10.1038/srep15971), 2015-11-02
Supplement: srep15971-s1.pdf [file srep15971-s1.pdf]

**Supplementary Information**

**Deacetylation-mediated interaction of SIRT1-HMGB1 improves  
survival in a mouse model of endotoxemia**

Jung Seok Hwang, Hyuk Soo Choi, Sun Ah Ham, Taesik Yoo, Won Jin Lee, Kyung Shin  
Paek, and Han Geuk Seo

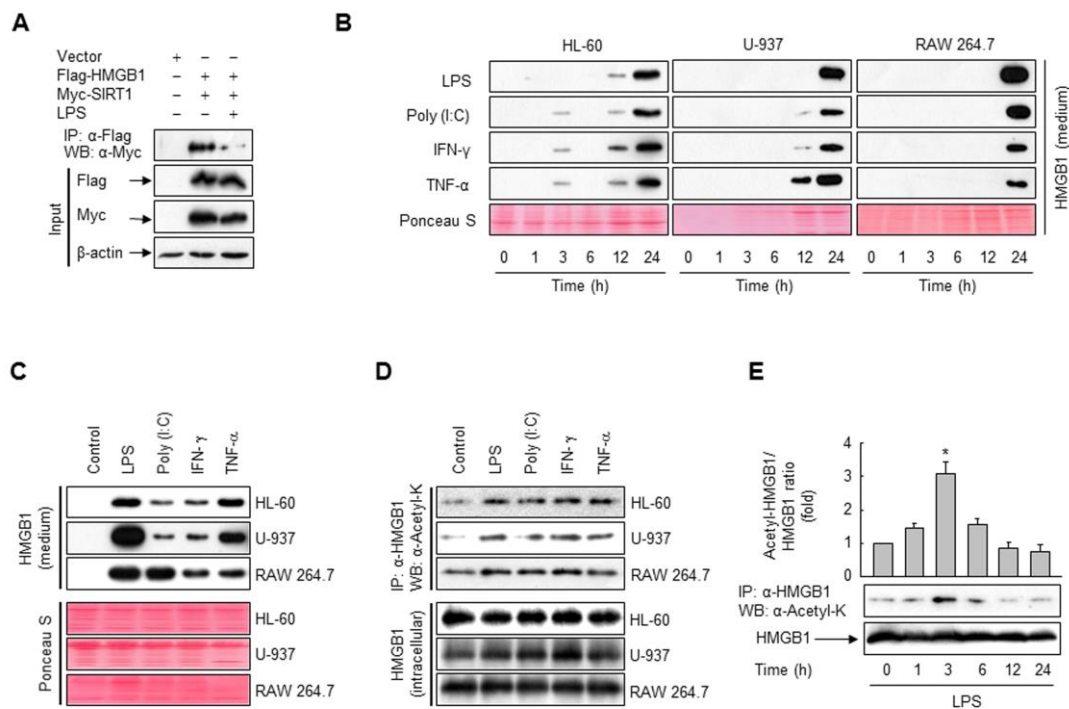

**Figure S1. Stimuli-induced release and acetylation level of HMGB1 in monocytic cell lineages.** (A) HEK293T cells co-transfected with Flag-HMGB1 and Myc-SIRT1 for 48 h were incubated with or without LPS (100 ng/ml) for 3 h, and then whole-cell lysates were prepared and immunoprecipitated with an anti-Flag antibody. The immunoprecipitates and total lysates (input) were subjected to immunoblot analysis with anti-Flag, anti-Myc, and anti- $\beta$ -actin antibodies to detect HMGB1, SIRT1, and  $\beta$ -actin, respectively. Two percent of whole-cell lysates were used as the input. (B,C) Cells seeded in 60 mm culture dishes were allowed to grow to 60% confluency and stimulated with LPS (100 ng/ml), Poly (I:C) (50  $\mu$ g/ml), IFN- $\gamma$  (40 ng/ml), or TNF- $\alpha$  (20 ng/ml) for the indicated amount of time (B) or 24 h (C) in serum-free medium. Equal volumes of conditioned media were subjected to Western blot analysis to detect HMGB1 released into the culture media. Ponceau S staining was used as a loading

control. (D) In a parallel group of cells treated with the indicated stimuli for 6 h, whole-cell lysates were prepared and immunoprecipitated with an anti-HMGB1 antibody. The immunoprecipitates were subjected to immunoblot analysis with anti-acetyl-lysine and anti-HMGB1 antibodies to detect acetylated HMGB1 and intracellular HMGB1, respectively. (E) HEK293T cells were treated with LPS (100 ng/ml) for the indicated amount of time. Whole-cell lysates were prepared and immunoprecipitated with an anti-HMGB1 antibody, and then subjected to immunoblot analysis with anti-acetyl-lysine and anti-HMGB1 antibodies to detect acetylated HMGB1 and intracellular HMGB1, respectively. Results are expressed as the means  $\pm$  standard error (n = 3). \*  $p < 0.01$  compared with untreated group.

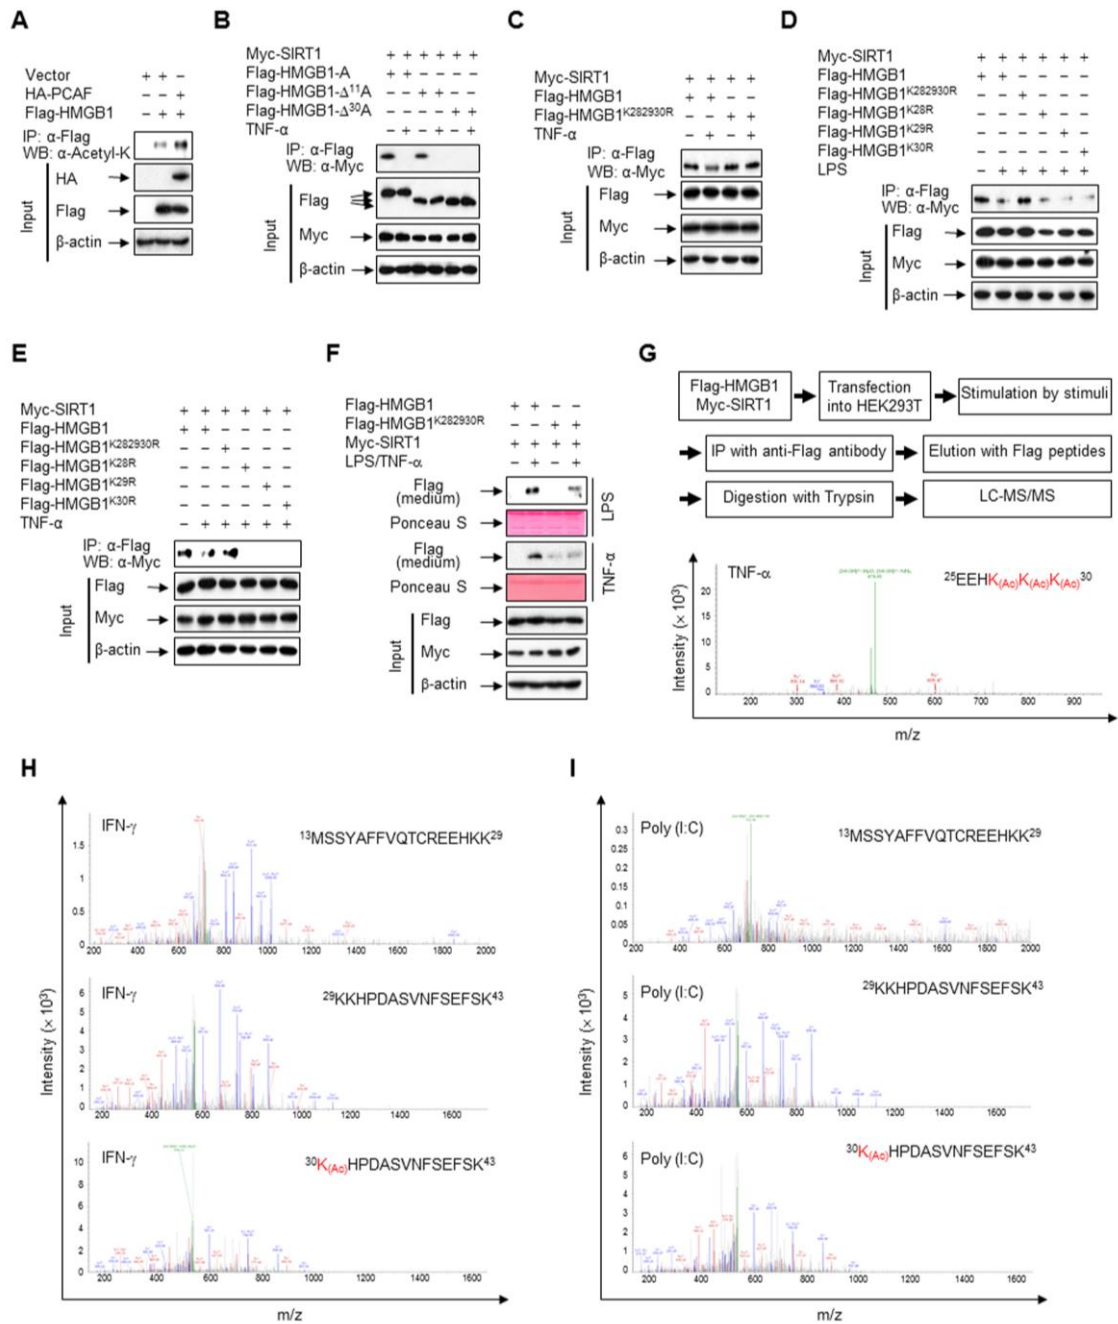

**Figure S2. Identification of the domain of HMGB1 responsible for its interaction with SIRT1.** (A) HEK293T cells were co-transfected with HA-PCAF and Flag-HMGB1 for 48 h, and then whole-cell lysates were prepared and immunoprecipitated with an anti-Flag antibody. The immunoprecipitates and total lysates (input) were subjected to immunoblot analysis with anti-Flag, anti-HA, and anti- $\beta$ -actin antibodies to

detect HMGB1, PCAF, and  $\beta$ -actin, respectively. Two percent of whole-cell lysates were used as the input. **(B)** HEK293T cells co-transfected with Myc-SIRT1 and Flag-HMGB1 mutants for 48 h were incubated with or without TNF- $\alpha$  (20 ng/ml) for 3 h, and then whole-cell lysates were prepared and immunoprecipitated with an anti-Flag antibody. The immunoprecipitates and total lysates (input) were subjected to immunoblot analysis with anti-Flag, anti-Myc, and anti- $\beta$ -actin antibodies to detect HMGB1, SIRT1, and  $\beta$ -actin, respectively. **(C-E)** HEK293T cells co-transfected with Myc-SIRT1 and wild-type or mutant Flag-HMGB1 for 48 h were incubated with or without TNF- $\alpha$  (20 ng/ml) or LPS (100 ng/ml) for 3 h, and then whole-cell lysates were prepared and immunoprecipitated with an anti-Flag antibody. The immunoprecipitates and total lysates (input) were subjected to immunoblot analysis as described above. **(F)** RAW 264.7 cells co-transfected with Myc-SIRT1 and Flag-HMGB1 or Flag-HMGB1<sup>K282930R</sup> for 48 h were incubated with or without TNF- $\alpha$  (20 ng/ml) or LPS (100 ng/ml) for 24 h in serum-free medium. Equal volumes of conditioned media were subjected to Western blot analysis to detect HMGB1 released into the culture media. Ponceau S staining was used as a loading control. **(G)** HEK293T cells co-transfected with Myc-SIRT1 and Flag-HMGB1 for 48 h were incubated with TNF- $\alpha$  (20 ng/ml) for 3 h, and then whole-cell lysates were prepared and immunoprecipitated with an anti-Flag antibody. The immunoprecipitates were digested with trypsin and subjected to LC-MS/MS analysis. The fragmentation spectrum of <sup>25</sup>EEHK<sub>(ac)</sub>K<sub>(ac)</sub>K<sub>(ac)</sub><sup>30</sup> revealed the presence of peptides with acetylation of lysine residues 28, 29, and 30. The protein preparation procedure for LC-MS/MS analysis is schematically illustrated. **(H,I)** HEK293T cells co-transfected with Myc-SIRT1 and Flag-HMGB1 for 48 h were incubated with or without IFN- $\gamma$  (40 ng/ml) or Poly (I:C) (50  $\mu$ g/ml) for 3 h, and then

whole-cell lysates were prepared and immunoprecipitated with an anti-Flag antibody. The immunoprecipitates were digested with trypsin and subjected to LC-MS/MS analysis. Acetylation of lysine residue 30, but not of lysine residues 28 or 29, was detected in the fragmentation spectrums of peptides from trypsin-digested HMGB1.

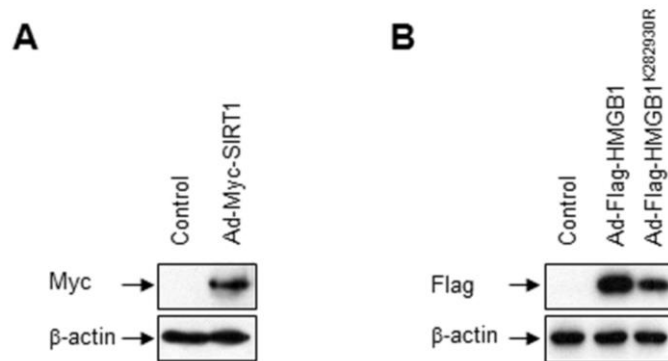

**Figure S3. Effects of adenoviral infection on the expression of Ad-Flag-HMGB1, Ad-Flag-HMGB1<sup>K282930R</sup>, or Ad-Myc-SIRT1.** (A,B) HeLa cells were infected with Ad-Flag-HMGB1, Ad-Flag-HMGB1<sup>K282930R</sup>, or Ad-Myc-SIRT1. Following incubation for 48 h, the cells were lysed, and aliquots of whole-cell lysates were subjected to Western blot analysis with anti-Flag and anti-Myc antibodies to detect adenovirus-mediated expression of Flag-HMGB1 and Myc-SIRT1, respectively.

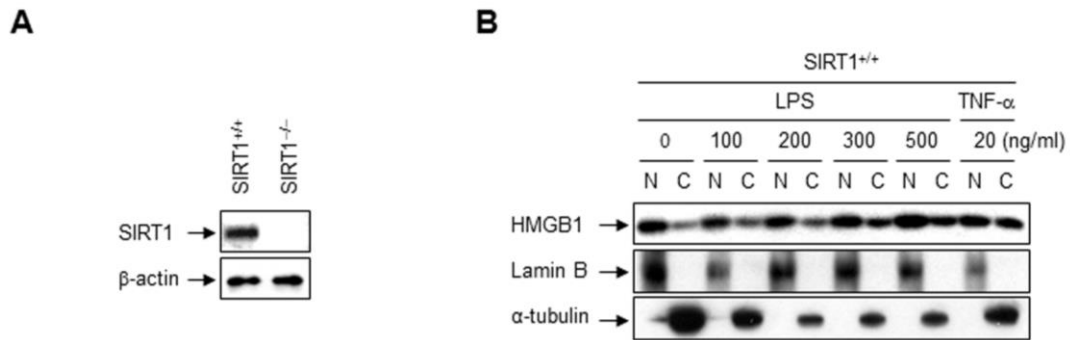

**Figure S4. Subcellular localization of HMGB1 in SIRT1<sup>+/+</sup> and SIRT1<sup>-/-</sup> MEFs stimulated with LPS or TNF-α.** (A) Whole-cell lysates were prepared from SIRT1<sup>+/+</sup> MEFs and SIRT1<sup>-/-</sup> MEFs, and the expression of SIRT1 was analyzed by Western blotting. (B) SIRT1<sup>+/+</sup> MEFs were treated with the indicated concentrations of LPS or TNF-α for 24 h, and then whole-cell lysates were fractionated into nuclear (N) and cytosolic (C) fractions. The localization of HMGB1 was analyzed by Western blotting with an anti-HMGB1 antibody. Lamin B and α-tubulin were used as loading controls for the nuclear and cytosolic fractions, respectively.



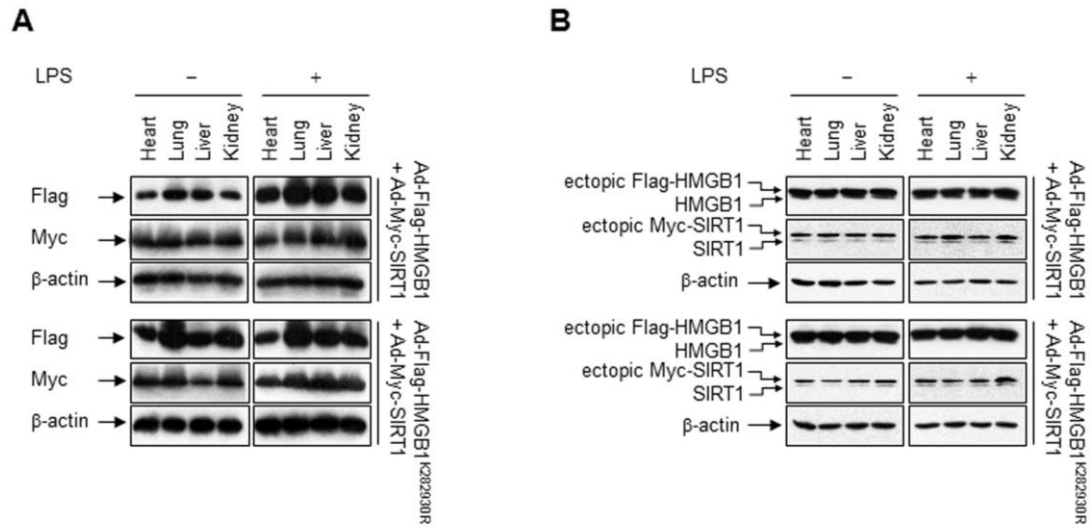

**Figure S5. Expression of HMGB1 and SIRT1 in mouse tissues infected with adenoviruses.** Tissues were prepared from BALB/c mice infected with Ad-Myc-SIRT1, Ad-Flag-HMGB1, and/or Ad-Flag-HMGB1<sup>K282930R</sup> at a multiplicity of infection of  $0.5 \times 10^{10}$  via the tail vein, followed by infusion of LPS or vehicle (5 mg/kg, i.p.) 3 days later. Ectopic (A) or endogenous (B) expression levels of HMGB1 and SIRT1 were analyzed by Western blot analysis using whole-tissue lysates.
